# Supplementary material for: Water nanotubes confined to nanochannels of a (10,3)-b net constructed by binary building blocks via the R22(9) synthon
Source: Royal Society of Chemistry journal article supplement (doi:10.1039/b809511f), 2008-01-01
Supplement: b809511f.pdf [file b809511f.pdf]

## Supporting Information

*for*

### **Water Nanotubes Confined to Nanochannels of (10,3)-b Net Constructed by the Binary Building Blocks via the $R^2_2(9)$ Synthon**

Ying Cui, Man-Li Cao, Li-Fei Yang, Yan-Li Niu, and Bao-Hui Ye\*

MOE Key Laboratory of Bioinorganic and Synthetic Chemistry, School of Chemistry and  
Chemical Engineering, Sun Yat-Sen University, Guangzhou 510275, China

Fax: Int. code +86 20 8411-2245

E-mail: cesybh@mail.sysu.edu.cn.

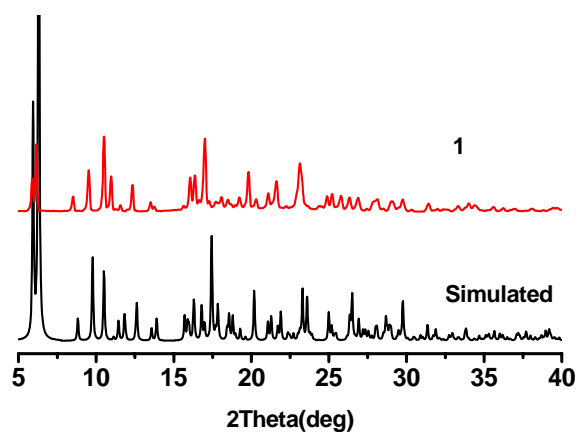

**Figure S1.** XRD pattern of **1** and the simulated pattern based on the single crystal **1**.

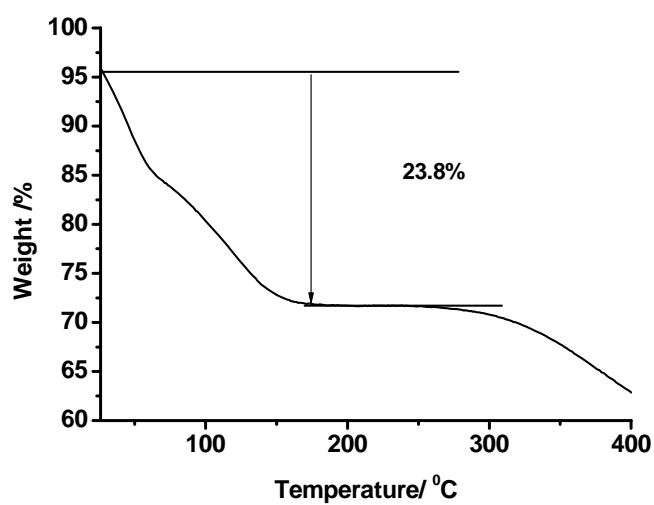

**Figure S2.** TGA of complex **1**.
